# Supplementary material for: Fe3O4@SiO2@VAN Nanoadsorbent Followed by GC-MS for the Determination of Polycyclic Aromatic Hydrocarbons at Ultra-Trace Levels in Environmental Water Samples
Source: MDPI journal article supplement (doi:10.3390/nano12172921), 2022-08-24
Supplement: s1 [file s1]

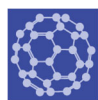

## Supplementary Materials

# Fe<sub>3</sub>O<sub>4</sub>@SiO<sub>2</sub>@VAN Nanoadsorbent Followed by GC-MS for the Determination of Polycyclic Aromatic Hydrocarbons at Ultra-Trace Levels in Environmental Water Samples

Yu Tian <sup>1</sup>, Zhigang Xu <sup>1,\*</sup>, Zhimin Liu <sup>1</sup>, Xiaoxi Si <sup>2,3,\*</sup>, Fengmei Zhang <sup>3</sup> and Wei Jiang <sup>3</sup>

<sup>1</sup> Faculty of Science, Kunming University of Science and Technology, Kunming 650500, China; yutian\_kmust@163.com (Y.T.); lab\_chem@126.com (Z.L.)

<sup>2</sup> Faculty of Environmental Science & Engineering, Kunming University of Science and Technology, Kunming 650500, China

<sup>3</sup> Yunnan Key Laboratory of Tobacco Chemistry, R&D Center of China Tobacco Yunnan Industrial Co., Ltd., Kunming 650231, China; zhangfm2008@126.com (F.Z.); ppp4466@163.com (W.J.)

\* Correspondence: xuzgkmust@gmail.com (Z.X.); sixiaoxi2006@126.com (X.S.)

## Abbreviations list

| No. | Abbreviations | Full name                        | No. | Abbreviations | Full name                              |
|-----|---------------|----------------------------------|-----|---------------|----------------------------------------|
| 1   | PAHs          | Polycyclic aromatic hydrocarbons | 16  | PH            | phenol                                 |
| 2   | PHE           | phenanthrene                     | 17  | TEOS          | tetraethyl orthosilicate               |
| 3   | AN            | anthracene                       | 18  | DCM           | dichloromethane                        |
| 4   | FA            | fluoranthene                     | 19  | GC-MS         | gas chromatography - mass spectrometry |
| 5   | PY            | pyrene                           | 20  | GC            | gas chromatography                     |
| 6   | BaA           | benzo[a]anthracene               | 21  | XRD           | X-ray diffraction                      |
| 7   | BbFA          | benzo[b]fluoranthene             | 22  | SEM           | scanning electron microscopy           |
| 8   | VAN           | vancomycin                       | 23  | TEM           | transmission electron microscope       |
| 9   | BPA           | bisphenol A                      | 24  | FT-IR         | fourier transform-infrared             |
| 10  | BPB           | bisphenol B                      | 25  | BET           | Brunauer–Emmett–Teller                 |
| 11  | PEG-2000      | polyethylene glycol-2000         | 26  | VSM           | vibra sample magnetometer              |
| 12  | DMF           | N, N-dimethylamide               | 27  | MSPE          | magnetic solid-phase extraction        |
| 13  | HCL           | hydrochloric acid                | 28  | SPE           | solid-phase extraction                 |
| 14  | EtOH          | ethanol                          | 29  | ASE           | Accelerated solvent extraction         |
| 15  | Py            | pyridine                         | 30  | MNPs          | magnetic nanoparticles                 |

## S1. Characterization

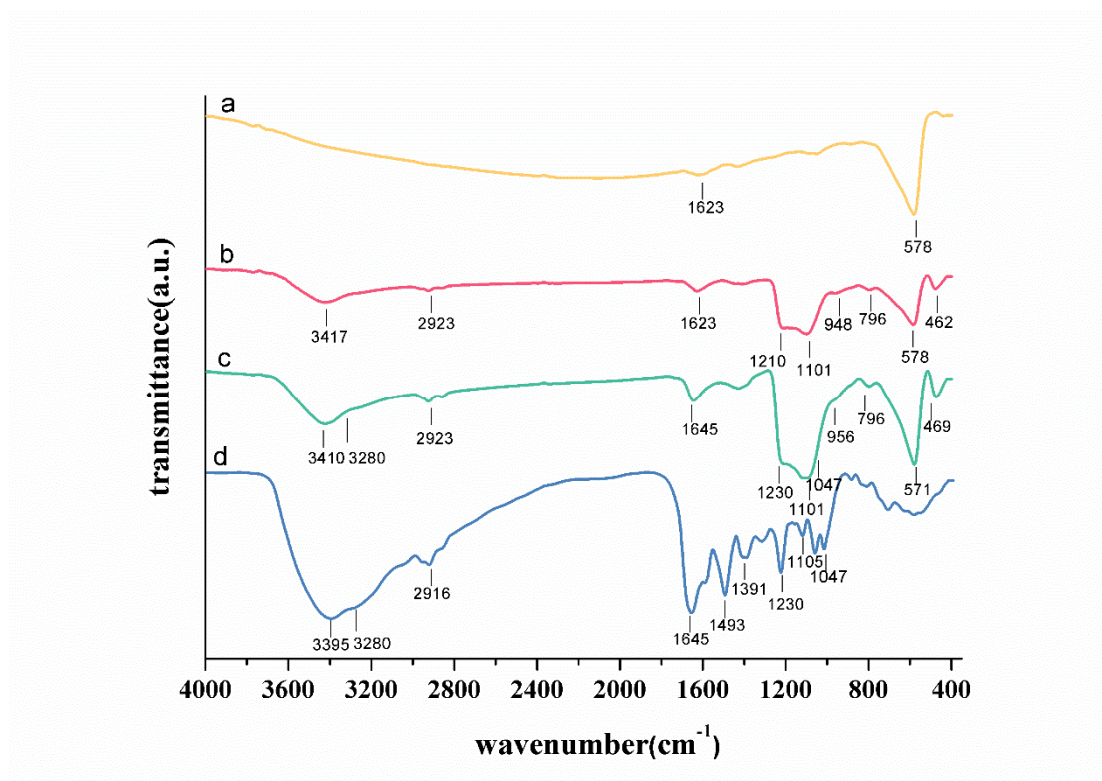

**Figure S1.** FT-IR spectra of (a)  $\text{Fe}_3\text{O}_4$ , (b)  $\text{Fe}_3\text{O}_4@\text{SiO}_2$ , (c)  $\text{Fe}_3\text{O}_4@\text{SiO}_2@\text{VAN}$  and (d) VAN.

**Table S1.** Specific surface area and pore structure parameters of  $\text{Fe}_3\text{O}_4$ ,  $\text{Fe}_3\text{O}_4@\text{SiO}_2$  and  $\text{Fe}_3\text{O}_4@\text{SiO}_2@\text{VAN}$ .

| Sample                                          | Specific Surface Area<br>( $\text{m}^2/\text{g}$ ) | Pore Volume ( $\text{cc/g}$ ) | Average Pore Size<br>(nm) |
|-------------------------------------------------|----------------------------------------------------|-------------------------------|---------------------------|
| $\text{Fe}_3\text{O}_4$                         | 18.715                                             | 0.128                         | 27.349                    |
| $\text{Fe}_3\text{O}_4@\text{SiO}_2$            | 19.446                                             | 0.137                         | 28.100                    |
| $\text{Fe}_3\text{O}_4@\text{SiO}_2@\text{VAN}$ | 22.048                                             | 0.108                         | 19.566                    |

## S2. Optimization of Extraction Conditions

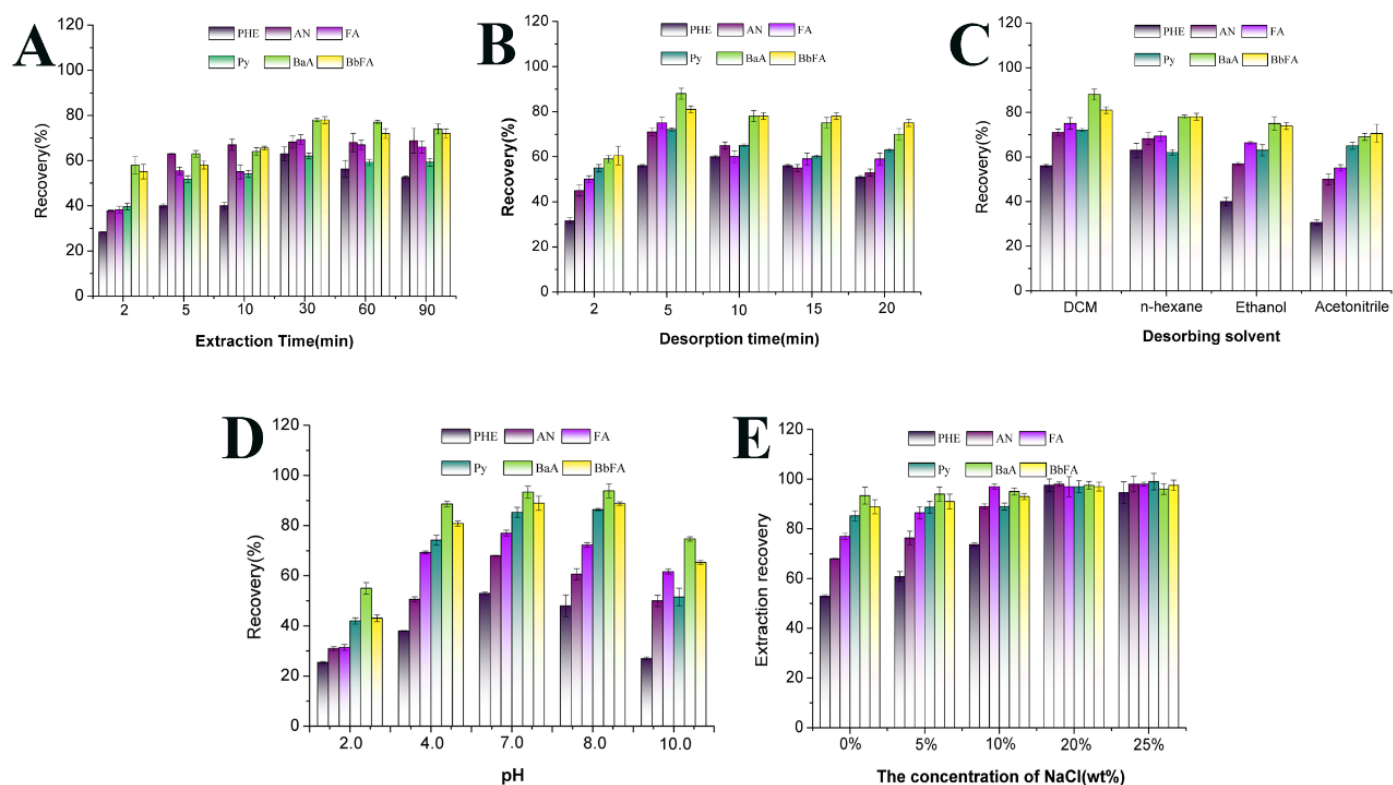

**Figure S2.** (A). Extraction time optimization; (B). Desorption time optimization; (C). Desorption solvent optimization; (D). Solution pH optimization; (E). The effect of solution ionic strength on the extraction effect of three kinds of PAHs.

**Table S2.** Physico-chemical characteristics of nine PAHs listed by USEPA.

| Name                 | Abbreviation | $S_w$ (mg L <sup>-1</sup> ) | $\log K_{ow}$ |
|----------------------|--------------|-----------------------------|---------------|
| Naphthalene          | Nap          | 31.5                        | 3.37          |
| Acenaphthene         | ACN          | 3.93                        | 3.92          |
| Fluorene             | Flo          | 1.69                        | 1.7           |
| Phenanthrene         | PHE          | 1.15                        | 4.57          |
| Anthracene           | AN           | 1.08                        | 4.54          |
| Fluoranthene         | FA           | 0.21                        | 5.22          |
| Pyrene               | PY           | 0.13                        | 5.18          |
| Benz(a)anthracene    | BaA          | 0.009                       | 5.91          |
| Benzo(b)fluoranthene | BbFA         | 0.002                       | 5.80          |

**Table S3.** Selectivity adsorption parameters of Fe<sub>3</sub>O<sub>4</sub>@SiO<sub>2</sub>@VAN for PAHs.

| Analytes | Extraction Recovery (%) | EF   | SC <sub>PHE/c</sub> | SC <sub>AN/c</sub> | SC <sub>FA/c</sub> | SC <sub>PY/c</sub> | SC <sub>BaA/c</sub> | SC <sub>BbFA/c</sub> |
|----------|-------------------------|------|---------------------|--------------------|--------------------|--------------------|---------------------|----------------------|
| PHE      | 97.0                    | 51.2 | /                   | /                  | /                  | /                  | /                   | /                    |
| AN       | 98.0                    | 58.0 | /                   | /                  | /                  | /                  | /                   | /                    |
| FA       | 97.0                    | 53.0 | /                   | /                  | /                  | /                  | /                   | /                    |
| PY       | 97.0                    | 52.6 | /                   | /                  | /                  | /                  | /                   | /                    |
| BaA      | 97.5                    | 54.0 | /                   | /                  | /                  | /                  | /                   | /                    |
| BbFA     | 97.0                    | 50.0 | /                   | /                  | /                  | /                  | /                   | /                    |
| ACN      | 44.3                    | 11.0 | 4.7                 | 5.3                | 4.8                | 4.8                | 4.9                 | 4.5                  |
| BPA      | 5.0                     | 2.28 | 22.5                | 25.4               | 23.2               | 23.1               | 23.7                | 21.9                 |
| BPB      | 5.6                     | 1.7  | 30.1                | 34.1               | 31.1               | 30.1               | 31.7                | 29.4                 |
| pyridine | 0.0                     | 0.0  | 0.0                 | 0.0                | 0.0                | 0.0                | 0.0                 | 0.0                  |
| phenol   | 0.0                     | 0.0  | 0.0                 | 0.0                | 0.0                | 0.0                | 0.0                 | 0.0                  |

Abbreviations:

SC<sub>PHE</sub> is selectivity coefficient of PHE.SC<sub>AN/c</sub> is selectivity coefficient of AN.SC<sub>FA/c</sub> is selectivity coefficient of FA.SC<sub>PY/c</sub> is selectivity coefficient of PY.SC<sub>BaA/c</sub> is selectivity coefficient of BaA.SC<sub>BbFA/c</sub> is selectivity coefficient of BbFA.**S3. The Chromatogram of Environmental Water Sample**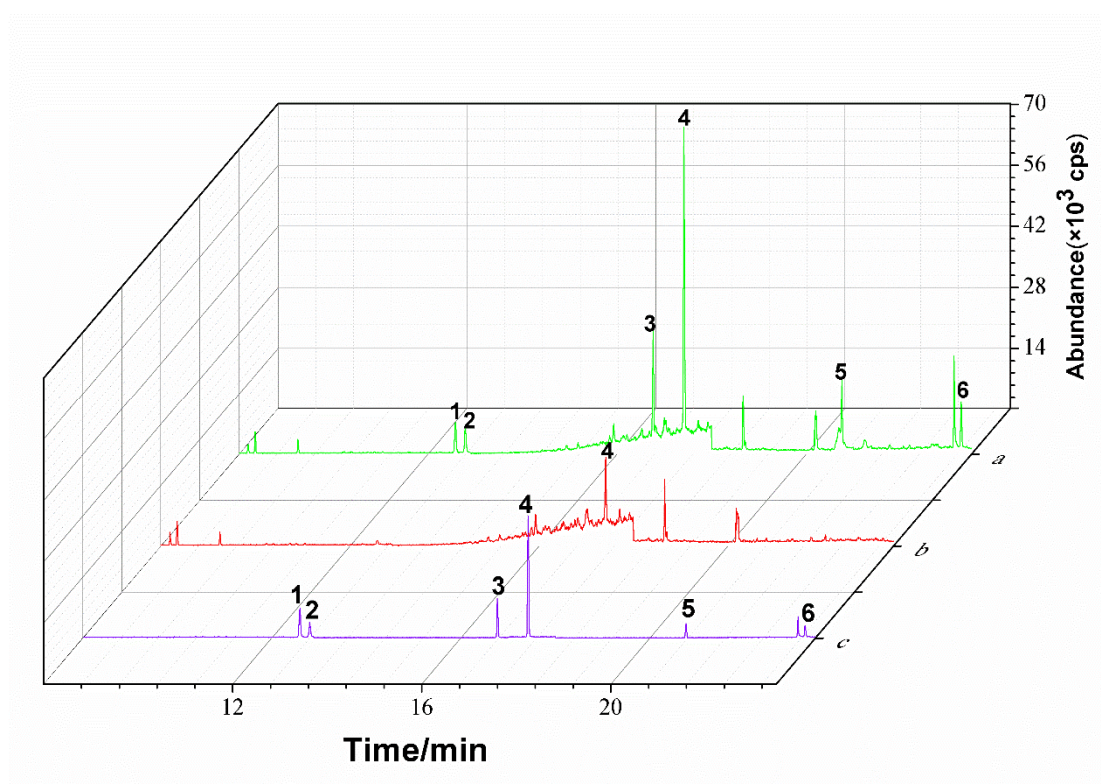**Figure S3.** Selected ion chromatogram of Laoyuhe River water sample. a). extraction chromatographic analysis after adding 1 µg/L. b). extraction chromatographic analysis of river water sample. c) 5 µg/L mixed standard solution. 1. phenanthrene, 2. anthracene, 3. fluoranthene, 4. pyrene, 5. Benzo[a]anthracene, 6. Benzo[b]fluoranthene.
